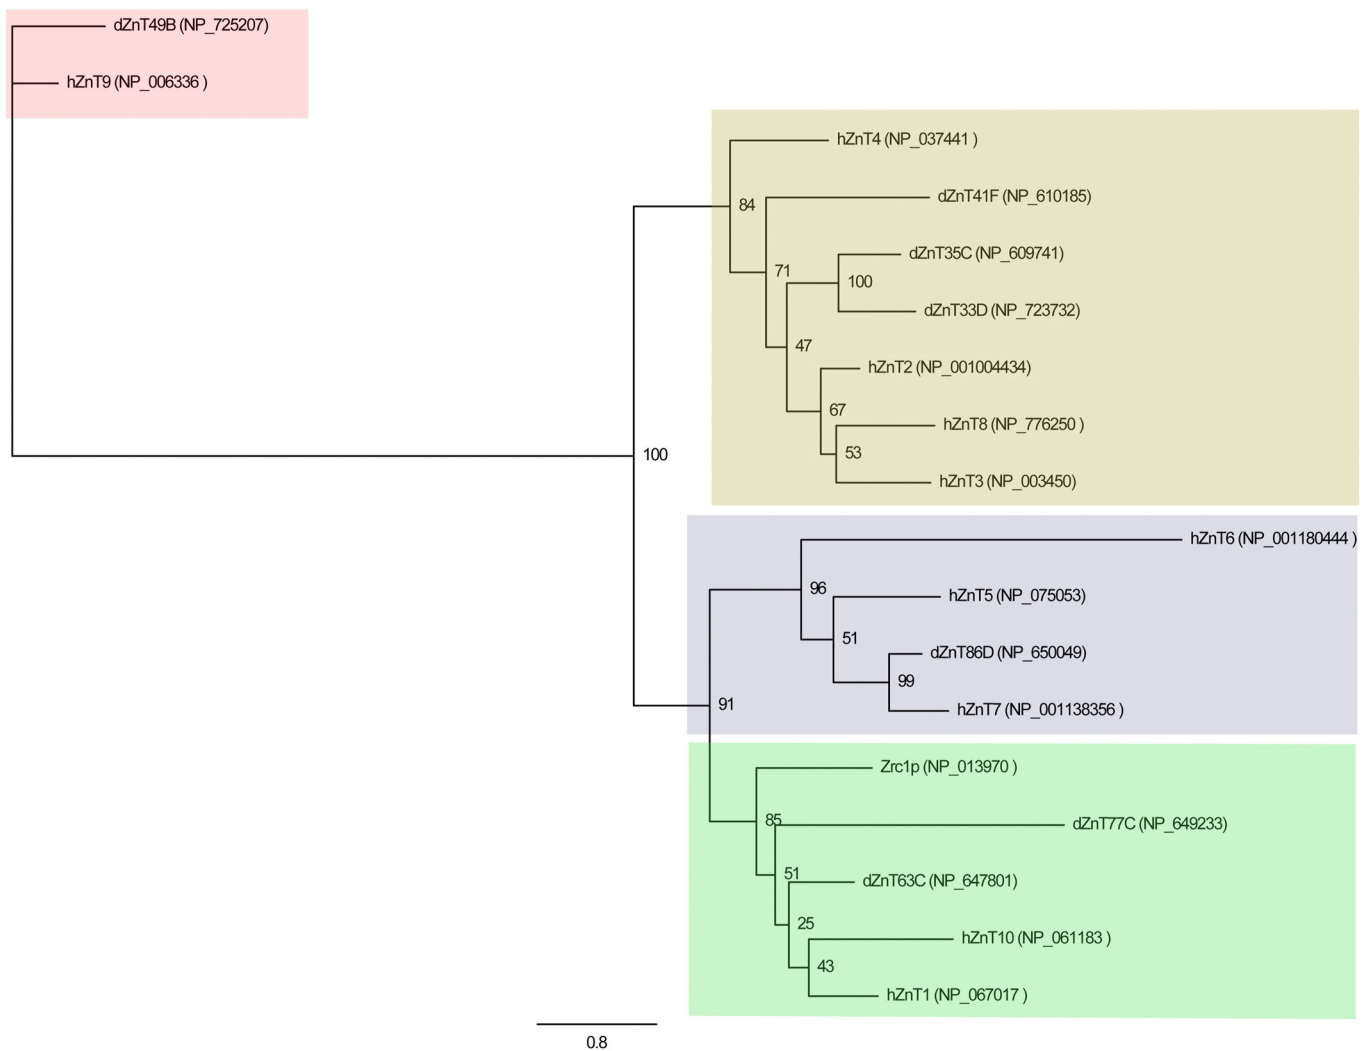

**Fig. S1.** Amino acid sequence comparison between *Drosophila*, mammalian and yeast ZnT proteins. Tree was generated using MUSCLE sequence alignment software and displayed with FigTree. The scale bars represent amino acid substitutions per amino acid site. Bootstrap values are included at nodes. Accession numbers are listed for each protein sequence used for the alignment. Proteins that display homology and group into clades are highlighted.

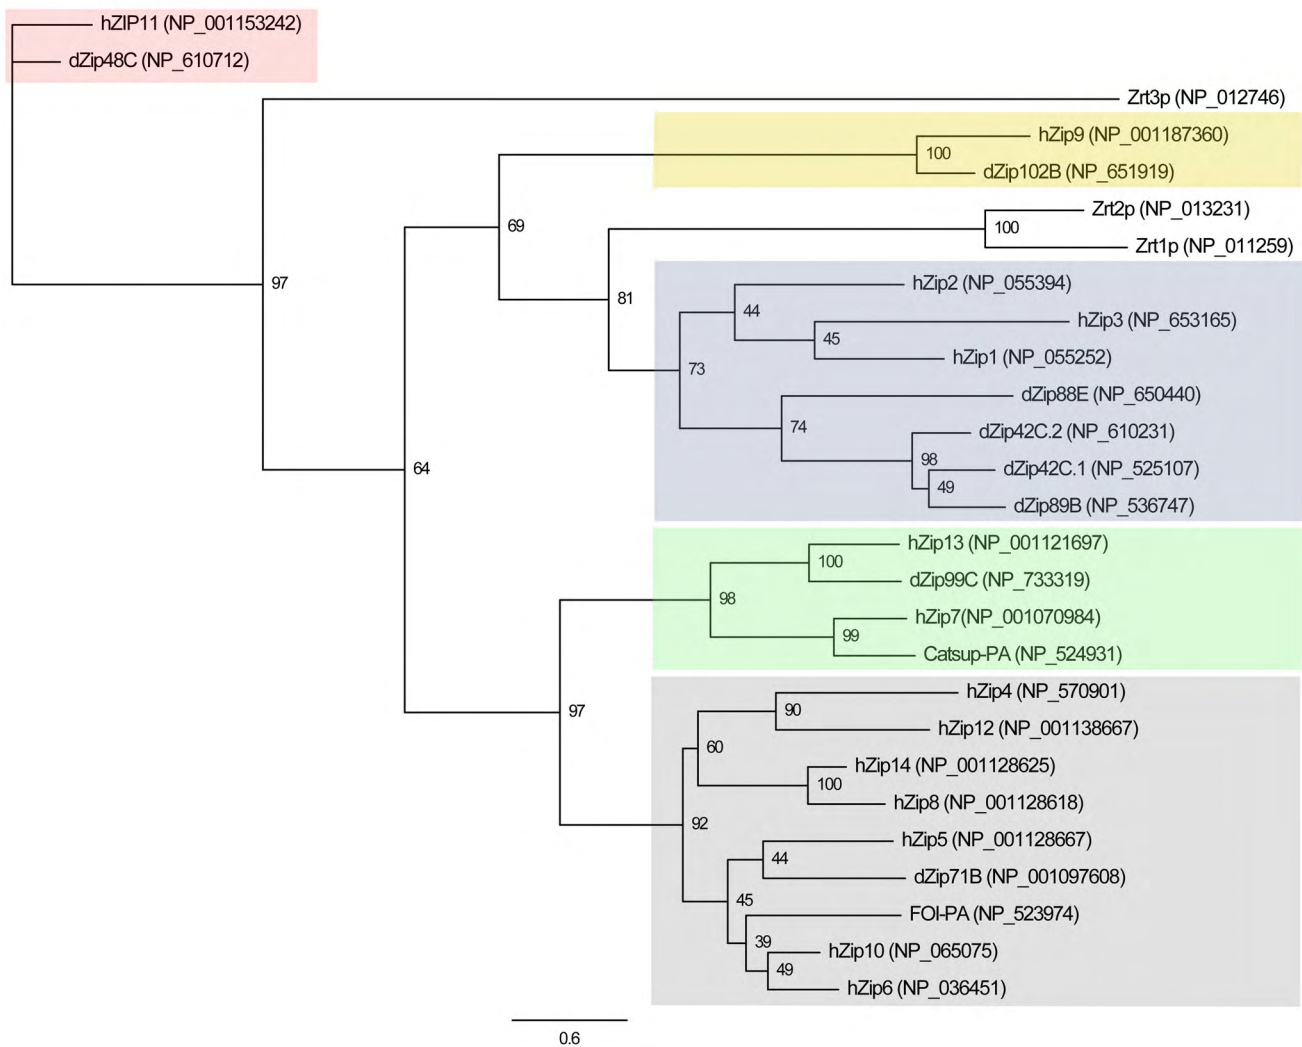

**Fig. S2.** Amino acid sequence comparison between *Drosophila*, mammalian and yeast Zip proteins. Tree was generated using MUSCLE sequence alignment software and displayed with FigTree. The scale bars represent amino acid substitutions per amino acid site. Bootstrap values are included at nodes. Accession numbers are listed for each protein sequence used for the alignment. Proteins that display homology and group into clades are highlighted.

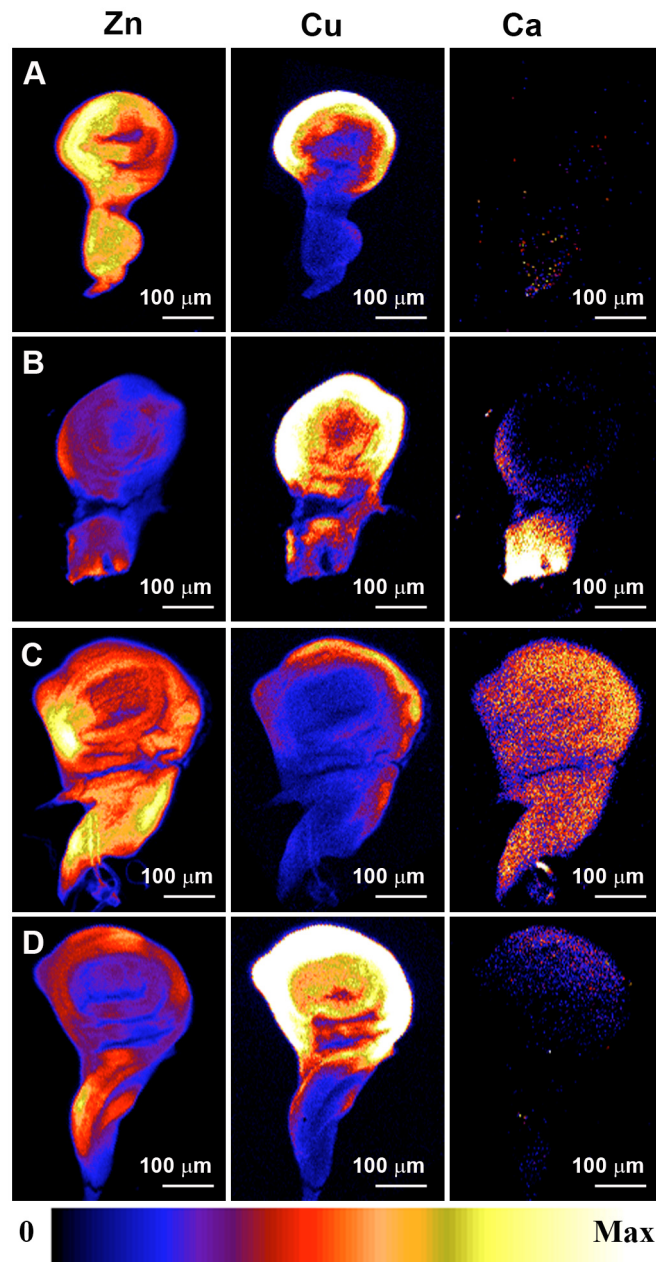

**Fig. S3.** Manipulation of zinc transporter gene expression alters spatial distribution of metals *in vivo*. XRF analysis of third instar wing imaginal discs, showing distribution of zinc (left panel), copper (middle panel) and calcium (right panel). Distribution is displayed as a heat map with the relative concentration shown at the bottom of the figure. For imaginal discs shown in panels A–D element visualization is normalized so that maximum values are as follows: zinc 264 ng cm<sup>-2</sup>, copper 59 ng cm<sup>-2</sup>, calcium 264 ng cm<sup>-2</sup>. Genotypes are: (A) Wild-type control disc; (B) *pannier>dZip42C.l<sup>flag</sup>*; (C) *pannier>dZnT63C<sup>RNAi</sup>*; (D) *pannier>dZip42C.l<sup>eGFP</sup>;dZnT63C<sup>RNAi</sup>*.

Table S1. Summary of *Drosophila* zinc transporter genes, isoforms, mammalian homologues and expression patterns

| Gene                     | Synonyms                                                             | Isoforms | Mammalian homologue     | Sequence similarity                                            | Temporal expression profile                                                                       | Tissue expression profile                                                            |
|--------------------------|----------------------------------------------------------------------|----------|-------------------------|----------------------------------------------------------------|---------------------------------------------------------------------------------------------------|--------------------------------------------------------------------------------------|
| cg11163<br>(FBgn0025693) | dZnT41F                                                              | 4        | hZnT2<br>hZnT3<br>hZnT8 | I: 36.5%, S: 61.0%<br>I: 43.0%, S: 64.8%<br>I: 46.9%, S: 72.7% | All stages (moderately high – high)                                                               | Larval and adult mid/hindgut and malphigian tubules, female spermatheca              |
| cg17723<br>(FBgn005432)  | dZnT1, dZnT63C                                                       | 5        | hZnT1<br>hZnT10         | I: 40.5%, S: 57.6%<br>I: 38.3%, S: 57.3%                       | All stages (moderately high – high)                                                               | Larval malphigian tubules and salivary glands                                        |
| cg31860<br>(FBgn0051860) | dZnT33D                                                              | 2 *      | hZnT2<br>hZnT3<br>hZnT8 | I: 44.1%, S: 63.2%<br>I: 41.2%, S: 62.2%<br>I: 40.3%, S: 59.7% | Pupae and adult male (moderate)                                                                   | Adult testis                                                                         |
| cg3994<br>(FBgn0028516)  | dZnT35C                                                              | 2 *      | hZnT2<br>hZnT3<br>hZnT8 | I: 49.7%, S: 68.4%<br>I: 37.0%, S: 53.9%<br>I: 36.2%, S: 54.4% | All stages (moderate – moderately high)                                                           | Malphigian tubules                                                                   |
| cg5130<br>(FBgn0037000)  | dZnT77C                                                              | 2        | hZnT1<br>dZnT10         | I: 38.0%, S: 59.9%<br>I: 28.8%, S: 52.2%                       | 00–06 and 18–24h embryo and L3 stage (moderately high)                                            | Malphigian tubules and male accessory gland                                          |
| cg6672<br>(FBgn0037875)  | dZnT86D                                                              | 1        | hZnT5<br>HznT6<br>hZnT7 | I: 48.7%, S: 65.7%<br>I: 61.3%, S: 74.9%                       | All stages (moderate – high)                                                                      | Salivary glands, adult malphigian tubules, female spermatheca, male accessory gland  |
| cg8632<br>(FBgn0033762)  | dZnT49B                                                              | 2        | hZnT9                   | I: 53.4%, S: 71.9%                                             | All stages (moderate) 00–04h embryo and adult females 5–30 days (high)                            | Ubiquitous expression                                                                |
| cg4334<br>(FBgn0038312)  | dZip88E                                                              | 1        | hZip3<br>hZip1<br>hZip2 | I: 34.5%, S: 52.6%<br>I: 28.3%, S: 47.2%<br>I: 31.9%, S: 52.9% | 12–24h embryo and L3 larval stage (moderately high)                                               | Larval salivary gland                                                                |
| cg9430<br>(FBgn0033097)  | dZip42C.2                                                            | 1        | hZip3<br>hZip1<br>hZip2 | I: 33.1%, S: 56.8%<br>I: 27.2%, S: 50.7%<br>I: 31.4%, S: 60.3% | adults <5 days (moderate)                                                                         | Adult midgut                                                                         |
| cg9428<br>(FBgn0033096)  | Zinc/iron regulated transporter-related protein 1 (dZip1), dZip42C.1 | 1        | hZip3<br>hZip1<br>hZip2 | I: 30.8%, S: 46.8%<br>I: 28.7%, S: 47.7%<br>I: 39.5%, S: 61.2% | 00–06h embryo and L1 to early L3 larval stage (v.low) adult (v.low) 30 day old adult female (low) | Larval midgut and trachea, low ubiquitous expression                                 |
| cg6898<br>(FBgn0038412)  | Zinc/iron regulated transporter-related protein 3 (dZip3), dZip89B   | 1        | hZip3<br>hZip1<br>hZip2 | I: 35.5%, S: 58.7%<br>I: 30.4%, S: 51.8%<br>I: 38.3%, S: 60.2% | 14h embryo onwards (moderate – moderately high)                                                   | Larval/adult hindgut and malphigian tubules, adult head                              |
| cg6817<br>(FBgn0024236)  | fear of intimacy (foi)                                               | 1        | hZip6<br>hZip10         | I: 33.9%, S: 51.9%<br>I: 35.4%, S: 55.9%                       | 00–10h and 14–20h embryo (moderately high – high) L1 and prepupae (moderately high)               | Ubiquitous expression                                                                |
| cg7816<br>(FBgn0039714)  | dZip99C                                                              | 9        | hZip13                  | I: 46.2%, S: 59.8%                                             | All stages (moderately high – high)                                                               | Larval and adult midgut, testis and male accessory gland                             |
| cg10449<br>(FBgn0002022) | catchecolamines up (catsup)                                          | 1        | hZip7                   | I: 52.0%, S: 65.3%                                             | All stages (moderately high – high)                                                               | Ubiquitous expression                                                                |
| cg10006<br>(FBgn0036461) | dZip71B                                                              | 1        | hZip5                   | I: 35.9%, S: 51.6%                                             | 14h embryo onwards (moderate – moderately high)                                                   | Larval and adult malphigian tubules                                                  |
| cg2177<br>(FBgn0039902)  | dZip102B                                                             | 3 *      | hZip9                   | I: 53.2%, S: 70.9%                                             | All stages (moderate – moderately high)                                                           | Larval/adult malphigian tubules, larval fat bodies, adult crop, male accessory gland |
| cg13189<br>(FBgn0033665) | dZip48C                                                              | 1        | hZip11                  | I: 54.3%, S: 66.0%                                             | All stages (moderate – moderately high)                                                           | Larval and adult malphigian tubules                                                  |

Putative zinc transport genes identified in the *Drosophila* genome, associated mammalian homologues and expression profiles. Blastp identified 17 putative zinc transport genes in the *Drosophila* genome. Many of these genes have not been characterized; however, synonyms have been provided for all putative zinc transport genes listed. Most isoforms differ in the 5' and 3' UTRs; however, isoforms that are alternatively spliced within coding regions are denoted with an asterisk. Many *Drosophila* zinc transport proteins have several possible mammalian homologues. Temporal expression profiles were sourced from modENCODE whilst tissue expression profiles were obtained from the FlyAtlas Anatomical Expression Data set. Only the highest temporal and spatial expression data are included.

Table S2. Oligonucleotides used to clone *Drosophila* zinc transporter genes

| Zinc transporter | Forward primer (5'–3')       | Reverse primer (5'–3')    |
|------------------|------------------------------|---------------------------|
| <i>dZnT41F</i>   | ATGCCAAAATATCAGAAGCT         | GACTCTGTTGTAGGTTCCAATTG   |
| <i>dZnT63C</i>   | ATGGCCAAGTACTCGGGC           | AACCAAATCGCTCTCGGCG       |
| <i>dZnT33D</i>   | ATGAGTAAAAAATCGCTT           | TTCAGATCCCGAGTGATTCT      |
| <i>dZnT35c</i>   | ATGTCCAGGAACGAGGATACAC       | CTTCTCGGGCACATTGCAC       |
| <i>dZnT77C</i>   | ATGGTAAAGGATATTCTCCAGCGG     | ATCGCTGCTCGTTGGCCC        |
| <i>dZnT86D</i>   | ATGATACCGCTGTCGCTGT          | AACATAATCCAAGTATGTAGAT    |
| <i>dZip88E</i>   | ATGAGCTTGCCAACCGAC           | ATCCTCATCAGAAAGATA        |
| <i>dZip42C.2</i> | ATGGTAGACCAACACTTAATCG       | TTTGGGCTTTTATAGTATGC      |
| <i>dZip42C.1</i> | ATGAGCGCTACCGCAA             | GGAACAGGTTAGGCTGTCA       |
| <i>dZip89B</i>   | ATGAATCAAACGCAAGTAAATAATTTCC | GGCGTCCTTCTTGGGGTG        |
| <i>foi</i>       | ATGGCGCGTCACATAATG           | GTGCGCGTCTGGTG            |
| <i>dZip99C</i>   | ATGACCACGAACAGCAGCTTC        | GTGTTCGAATAGCATGGTCATCAC  |
| <i>Catsup</i>    | ATGGCCAAACAAGTGGCTGA         | CTCGAACTTGGCGATAACGATCATT |
